# Supplementary material
Source: PubMed Central journal article supplement (PMC8900222)
Supplement: NIHMS1785569-supplement-1.pdf [file NIHMS1785569-supplement-1.pdf]

**Supplemental Table 1.** Clinical and demographic characteristics of people living with HIV at six sites across the United States with type 2 myocardial infarction by sepsis status and age (<50 vs. ≥50 years old)

| Characteristic                         | T2MI n<br>No sepsis<br>N=263<br>N (%) | T2MI<br>Sepsis<br>N=150<br>N (%) | T2MI Sepsis<br><50 years old<br>N=72<br>N (%) | T2MI Sepsis<br>≥50 years old<br>N=78<br>N (%) |
|----------------------------------------|---------------------------------------|----------------------------------|-----------------------------------------------|-----------------------------------------------|
| Age, years median (IQR)                | 50 (43,56)                            | 50 (40,58)                       | 40 (34,45)                                    | 57 (54,63)                                    |
| Age, years by decade                   |                                       |                                  |                                               |                                               |
| <30                                    | 10 (4)                                | 10 (7)                           | 10 (14)                                       | 0 (0)                                         |
| 30-39                                  | 21 (8)                                | 26 (17)                          | 26 (36)                                       | 0 (0)                                         |
| 40-49                                  | 98 (37)                               | 36 (24)                          | 36 (50)                                       | 0 (0)                                         |
| 50-59                                  | 101 (38)                              | 46 (31)                          | 0 (0)                                         | 46 (59)                                       |
| 60-69                                  | 22 (8)                                | 23 (15)                          | 0 (0)                                         | 23 (29)                                       |
| ≥70                                    | 11 (4)                                | 9 (6)                            | 0 (0)                                         | 9 (12)                                        |
| Sex                                    |                                       |                                  |                                               |                                               |
| Male                                   | 199 (76)                              | 102 (68)                         | 46 (64)                                       | 56 (72)                                       |
| Race/Ethnicity                         |                                       |                                  |                                               |                                               |
| White                                  | 66 (25)                               | 40 (27)                          | 16 (22)                                       | 24 (31)                                       |
| African American                       | 172 (65)                              | 92 (61)                          | 48 (67)                                       | 44 (56)                                       |
| Hispanic                               | 20 (8)                                | 14 (9)                           | 5 (7)                                         | 9 (12)                                        |
| Other/unknown                          | 5 (2)                                 | 4 (3)                            | 3 (4)                                         | 1 (1)                                         |
| HIV Transmission Risk Factor           |                                       |                                  |                                               |                                               |
| Heterosexual                           | 71 (27)                               | 52 (35)                          | 26 (36)                                       | 26 (33)                                       |
| Men who have sex with men              | 88 (33)                               | 39 (26)                          | 20 (28)                                       | 19 (24)                                       |
| Injection drug use                     | 97 (37)                               | 50 (33)                          | 24 (33)                                       | 26 (33)                                       |
| Other/unknown                          | 7 (3)                                 | 9 (6)                            | 2 (3)                                         | 7 (9)                                         |
| Antiretroviral therapy                 |                                       |                                  |                                               |                                               |
| Yes                                    | 189 (72)                              | 109 (73)                         | 51 (71)                                       | 58 (74)                                       |
| CD4 count closest to event (cells/μl)  |                                       |                                  |                                               |                                               |
| 0-200                                  | 99 (38)                               | 71 (47)                          | 43 (60)                                       | 28 (36)                                       |
| 201-350                                | 53 (20)                               | 22 (15)                          | 8 (11)                                        | 14 (18)                                       |
| >350                                   | 111 (42)                              | 57 (38)                          | 21 (29)                                       | 36 (46)                                       |
| Nadir CD4 cell count (cells/μl)        |                                       |                                  |                                               |                                               |
| Median (IQR)                           | 126 (20,264)                          | 85 (10,188)                      | 21 (5,125)                                    | 129 (44, 244)                                 |
| HIV-1 RNA closest to event (copies/ml) |                                       |                                  |                                               |                                               |
| <500                                   | 148 (56)                              | 81 (54)                          | 29 (40)                                       | 52 (67)                                       |

|                                  |           |           |           |           |
|----------------------------------|-----------|-----------|-----------|-----------|
| 500-100,000                      | 77 (29)   | 44 (29)   | 25 (35)   | 19 (24)   |
| >100,000                         | 38 (14)   | 25 (17)   | 18 (25)   | 7 (9)     |
| Lipid Levels mean (mean, SD)     |           |           |           |           |
| HDL (mg/dL)                      | 46 (20)   | 38 (18)   | 35 (17)   | 41 (19)   |
| LDL (mg/dL)                      | 86 (36)   | 88 (42)   | 89 (44)   | 87 (41)   |
| Total Cholesterol (mg/dL)        | 169 (61)  | 155 (52)  | 149 (48)  | 160 (55)  |
| Triglycerides                    | 201 (266) | 175 (113) | 162 (102) | 187 (121) |
| Statin use                       |           |           |           |           |
| Yes                              | 65 (25)   | 38 (25)   | 7 (10)    | 31 (40)   |
| Blood pressure (mean, SD)        |           |           |           |           |
| Systolic (mmHg)                  | 132 (24)  | 126 (21)  | 120 (21)  | 130 (21)  |
| Diastolic (mmHg)                 | 80 (14)   | 77 (13)   | 76 (14)   | 77 (12)   |
| Anti-hypertensive medication use |           |           |           |           |
| Yes                              | 182 (70)  | 91 (61)   | 32 (45)   | 59 (77)   |
| Diabetes                         |           |           |           |           |
| Yes                              | 72 (27)   | 41 (27)   | 9 (13)    | 32 (41)   |
| Ever smoking                     |           |           |           |           |
| Yes                              | 117 (44)  | 63 (42)   | 31 (43)   | 32 (41)   |
| Body mass index (mean, SD)       |           |           |           |           |
| BMI (kg/m <sup>2</sup> )         | 25 (6)    | 25 (7)    | 24 (7)    | 26 (7)    |
| Risk Score (mean, SD)            |           |           |           |           |
| ASCVD (%10 year event risk)      | 14 (15)   | 13 (13)   | 6 (6)     | 19 (14)   |

Demographic and clinical characteristics at time of MI

MI: myocardial infarctions; T1MI: type 1 myocardial infarction; T2MI type 2 myocardial infarctions
